# Supplementary material for: Cutin:cutin-acid endo-transacylase (CCT), a cuticle-remodelling enzyme activity in the plant epidermis
Source: PubMed Central journal article supplement (PMC7925011; doi:10.1042/bcj20200835), 2021-02-24
Supplement: BCJ-478-777-s1.pdf [file BCJ-478-777-s1.pdf]

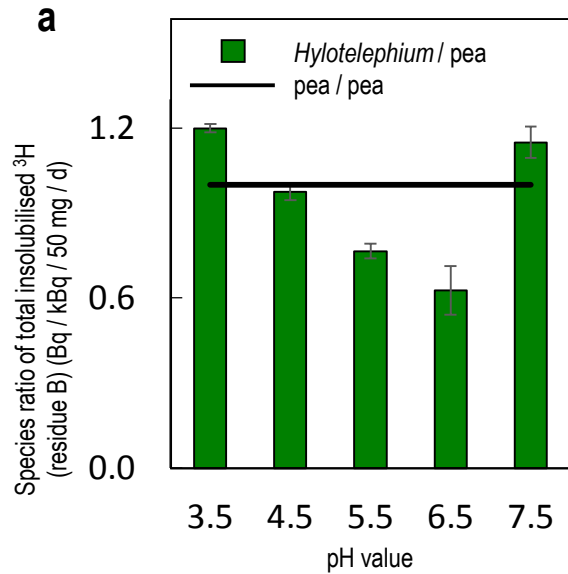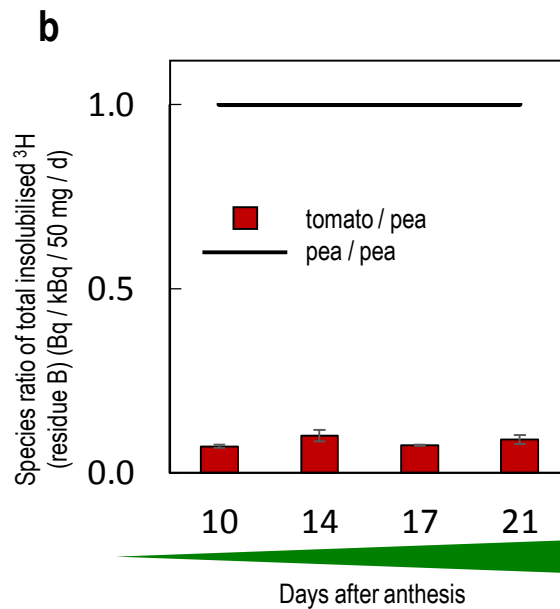

**Fig. S1. Comparison of *in-situ* [<sup>3</sup>H]HHA insolubilisation by epidermis of *Hylotelephium*, tomato and pea.**

Blotted fresh epidermis (50 mg, from rapidly expanding organs) was incubated with 0.14–0.62 kBq [<sup>3</sup>H]HHA in 300  $\mu$ l buffer at 20°C for 24 h. Total <sup>3</sup>H that become insoluble in acidified methanol (= residue B of Fig. 2) was assayed.

(a) Comparison of epidermis from *Hylotelephium* leaf (adaxial) and pea epicotyl, at various pH values. Bars indicate standard errors ( $n = 3$ ).

(b) Comparison of epidermis from tomato fruit (cv. Ailsa Craig) and pea epicotyl, at pH 5.5. Tomato fruits at 10–21 days after anthesis are rapidly expanding. Bars indicate range ( $n = 2$ ).

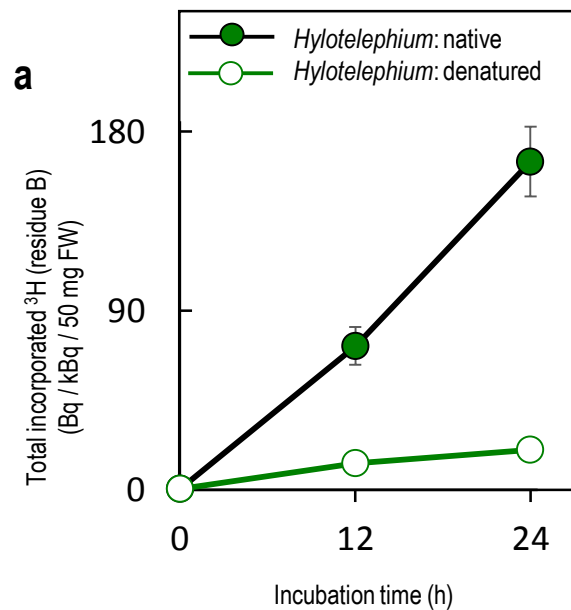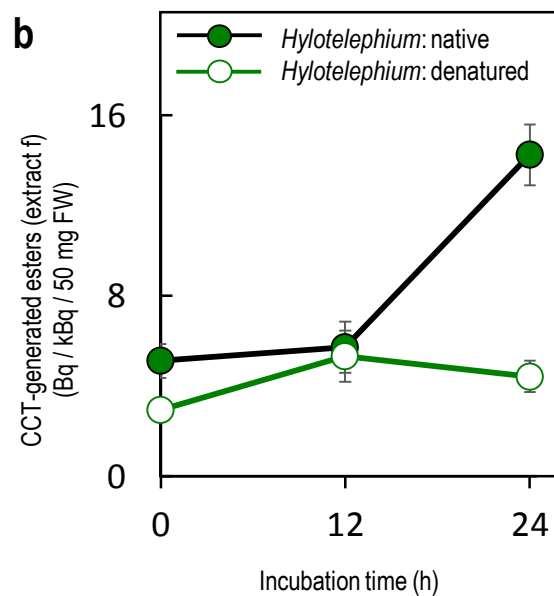

**Fig. S2. Time-course of [ $^3\text{H}$ ]HHA insolubilisation and ester bond formation in *Hylothelephium* leaf epidermis *in situ*.**

(a) [ $^3\text{H}$ ]HHA incorporation into the methanol-insoluble fraction of *Hylothelephium* leaf epidermis *in situ* at pH 5.5. Each native or heat-denatured, 50-mg epidermis sample was incubated with 0.44 kBq [ $^3\text{H}$ ]HHA in 300  $\mu\text{l}$  buffer at 20°C. Total methanol-insoluble  $^3\text{H}$ -labelled products (residue B of Fig. 2) were assayed.

(b) [ $^3\text{H}$ ]HHA incorporation into the alkali-releasable material (extract f of Fig. 2; CCT products) of same samples.

Bars indicate standard errors ( $n = 3$ ).

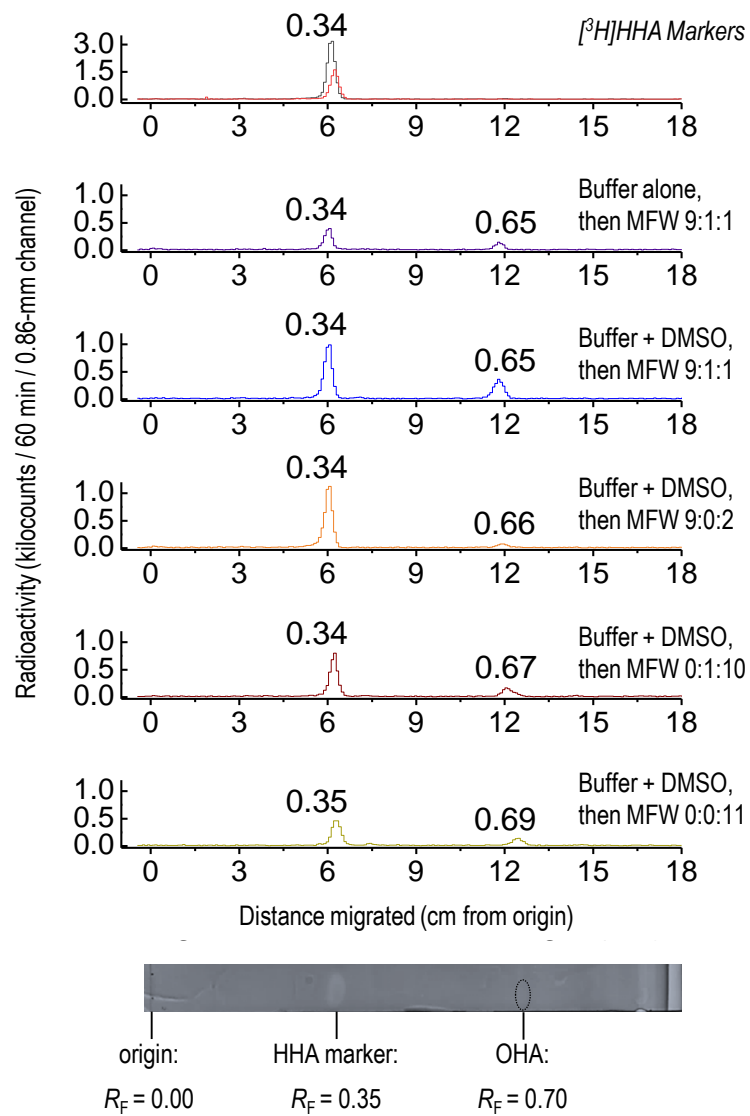

**Fig. S3. HHA gives OHA as a by-product during methanolic extraction.**

This experiment documents the non-enzymic formation of radiolabelled oxohexadecanoic acid (OHA) as a by-product when authentic  $[^3\text{H}]\text{HHA}$  is incubated in the various solvents indicated. Routinely, in our *in-situ* experiments,  $[^3\text{H}]\text{HHA}$  was dissolved in a small volume of DMSO then diluted into succinate buffer, and after incubation with epidermis the unincorporated radioactivity was extracted in MFW (9:1:1). In the present experiment we varied these solvents to test which of them contributed to by-product formation. Products were analysed by TLC.

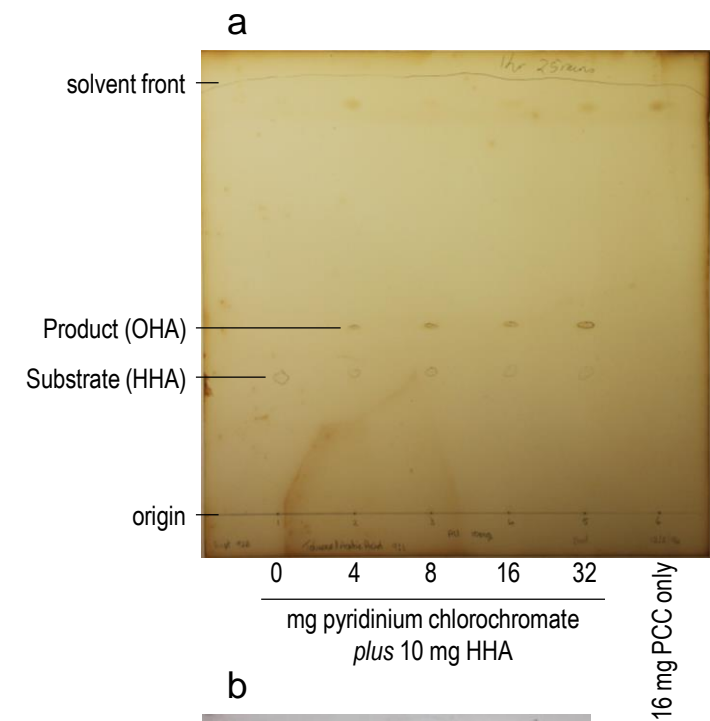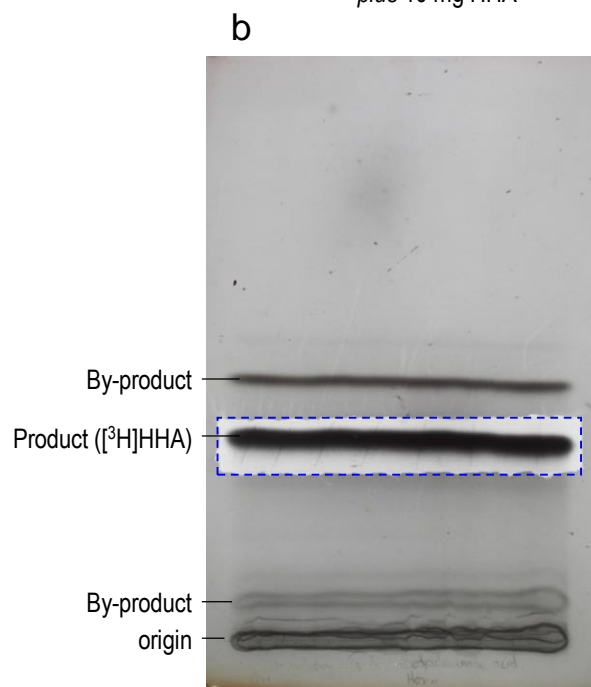

**Fig. S4. Preparation of 16-hydroxy-[16- $^3\text{H}$ ]hexadecanoic acid (HHA).**

Thin-layer chromatograms (TLCs) illustrating the preparation of [ $^3\text{H}$ ]HHA.

(a) Optimising the dose of pyridinium chlorochromate (PCC) required to convert 10 mg of non-radioactive 16-hydroxyhexadecanoic acid (HHA) to 16-oxohexadecanoic acid (OHA).

(b) Autoradiogram of a preparative TLC of the tritiated products obtained after treatment of OHA with  $\text{NaB}^3\text{H}_4$ ; overlaid on the TLC plate. The main radioactive band ( $[^3\text{H}]\text{HHA}$ ) was cut out for elution.

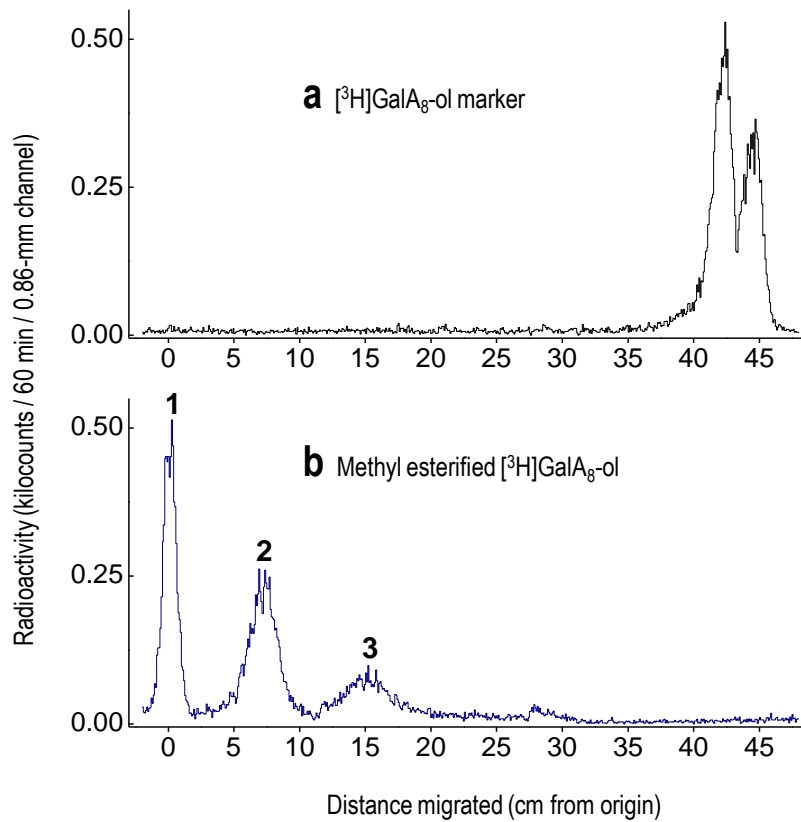

**Fig. S5. Preparation of methylesterified  $[^3\text{H}]\text{GalA}_8\text{-ol}$ .**

$\alpha\text{-(1}\rightarrow\text{4)-}[1\text{-}^3\text{H}]\text{GalA}_8\text{-ol}$  (= reductively tritiated octasaccharide of homogalacturonan) was methylesterified by reaction with methanol in the presence of *N*-ethyl-*N'*-(3-dimethylaminopropyl)carbodiimide (EDC) and *N*-hydroxysuccinimide (NHS) [Sehgal, D. and Vijay, I.K. (1994). A method for the high efficiency of water-soluble carbodiimide-mediated amidation. *Anal. Biochem.* **218**, 87–91]. Substrate and products were resolved by paper electrophoresis, yielding: 1,  $\text{Me}_8\text{-}[^3\text{H}]\text{GalA}_8\text{-ol}$ ; 2,  $\text{Me}_7\text{-}[^3\text{H}]\text{GalA}_8\text{-ol}$ ; 3,  $\text{Me}_6\text{-}[^3\text{H}]\text{GalA}_8\text{-ol}$  (where Me represents a methylester group). (a)  $[^3\text{H}]\text{GalA}_8\text{-ol}$  substrate; (b) methylesterified products.

*p35S::CUS1*

Untransformed *N. benthamiana*

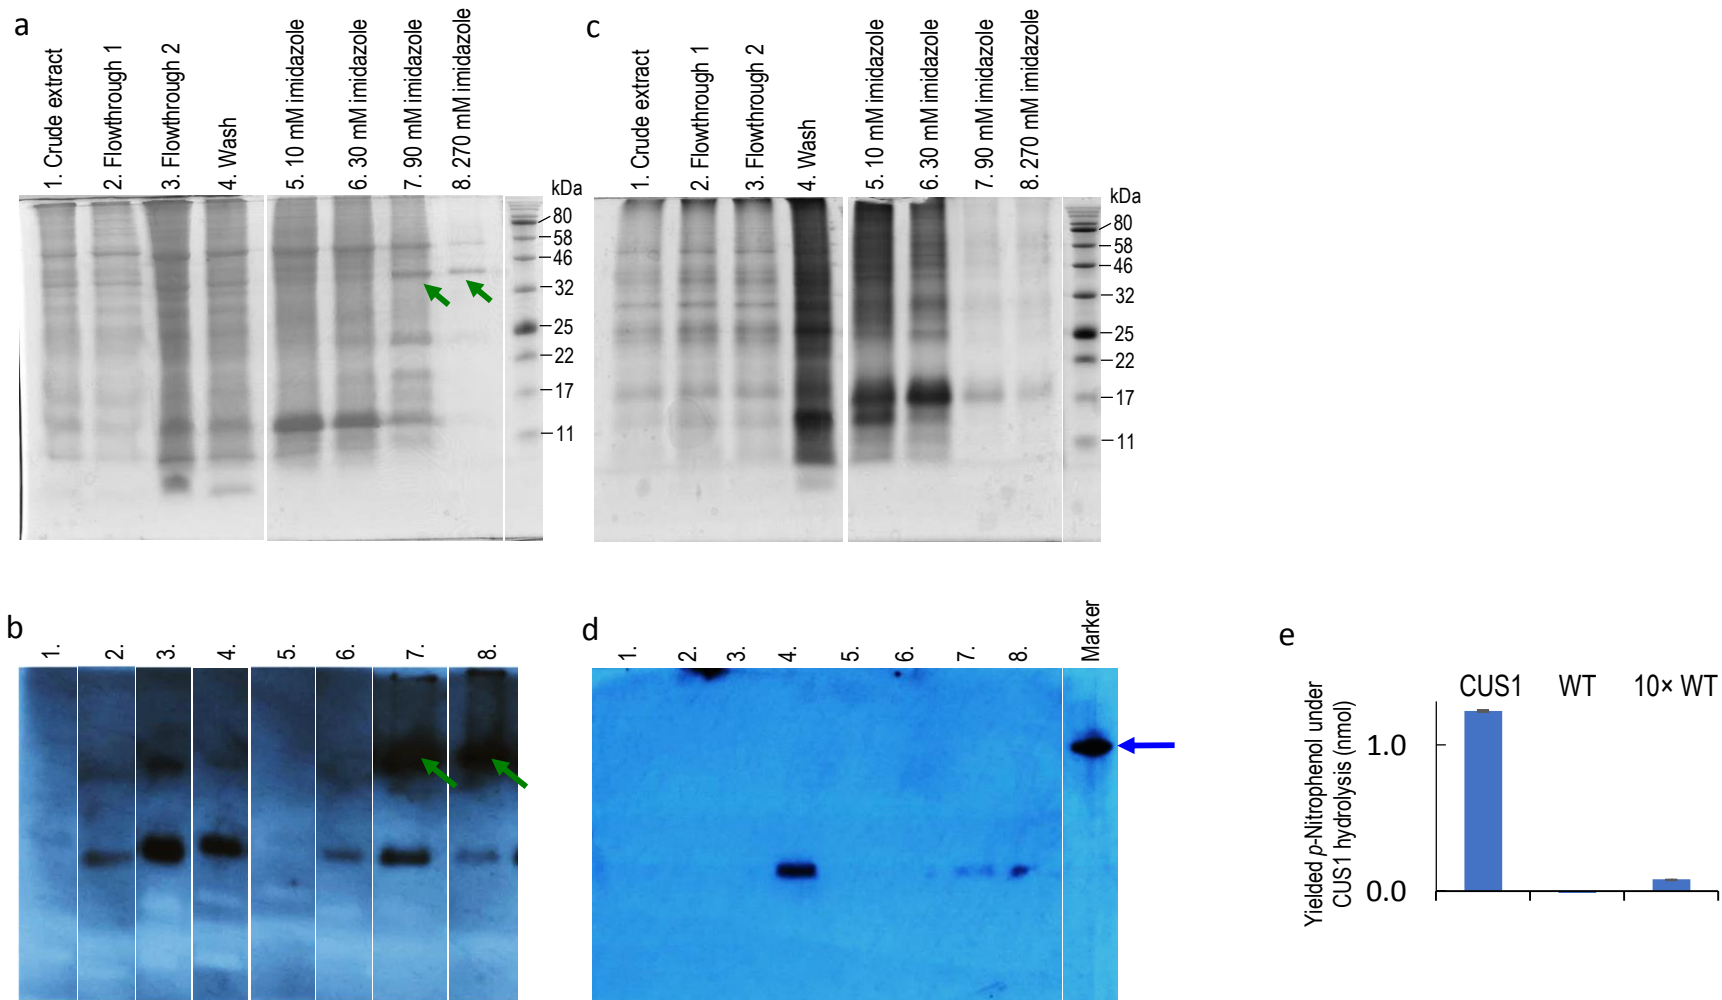

**Fig. S6. Purification of *N. benthamiana*-expressed His<sub>6</sub>-tagged CUS1.**

(a, b) SDS-PAGE of fractions from *Nicotiana benthamiana* leaf infiltrated with *Agrobacterium* harbouring *p35S::CUS1*. (a) Gel stained with Coomassie Brilliant Blue R-250; (b) bands on a duplicate gel visualised with anti-poly-His–HRP antibody. Green arrows point to the His<sub>6</sub>-tagged CUS1 (~41 kDa).

(c, d) As a and b but with the corresponding fractions from non-infiltrated *N. benthamiana*. Blue arrow points to a His<sub>6</sub>-tagged positive control protein [arabidopsis MS11 (~50 kDa; multicopy suppressor of IRA; Schmitges et al., 2011); kindly donated by Prof. J.W. Goodrich, The University of Edinburgh].

(e) *In-vitro* hydrolysis of fatty-acyl ester by CUS1. *p*-Nitrophenyl palmitate (50 μM) was incubated at 25°C for 3 d in 100 μl aqueous 25 mM succinate (Na<sup>+</sup>) buffer (pH 6.0) with 1 μg purified His<sub>6</sub>-tagged CUS1 or a blank preparation from untransformed *N. benthamiana* (1× and 10× concentration relative to the fresh weight of *N. benthamiana* used for preparation of CUS1). The yield of free *p*-nitrophenol, produced by ester hydrolysis, was assayed by *A*<sub>405</sub> at pH 7.15 ± 0.02 and calculated as: reaction-mixture *A*<sub>405</sub> corrected by subtracting the CUS1-only *A*<sub>405</sub> and the *p*-nitrophenyl palmitate-only *A*<sub>405</sub>, and converted to nmol by the Beer–Lambert Law. Bar indicates standard error (n=3). P < 0.01.

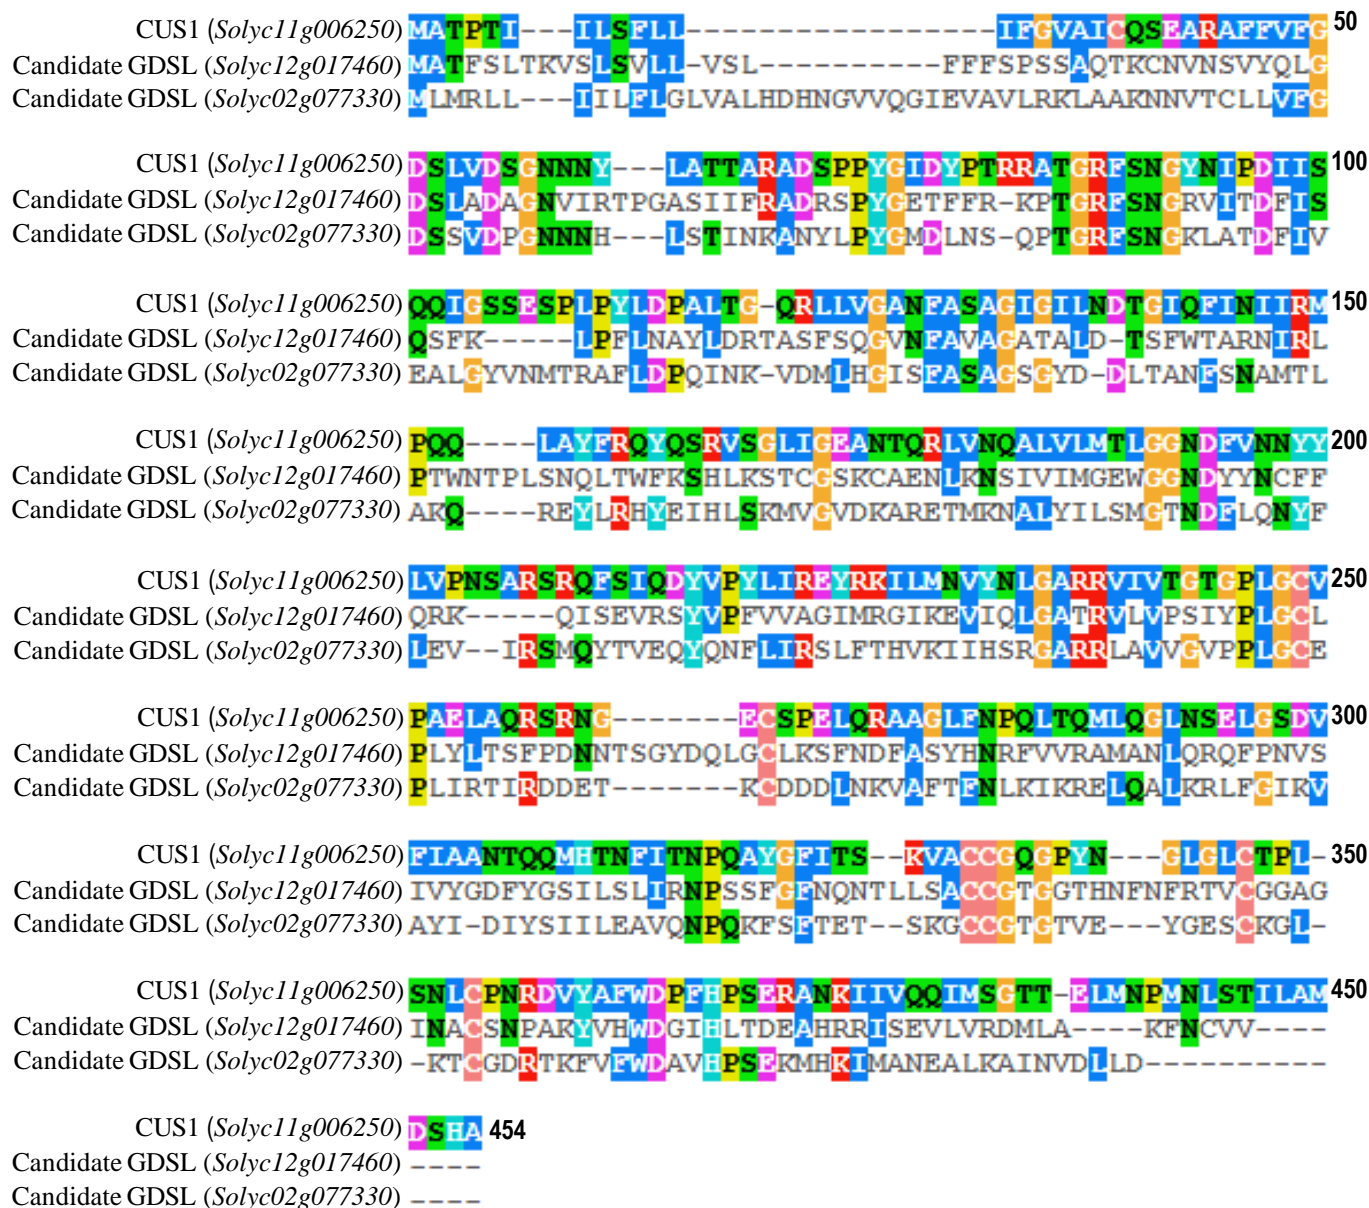

Fig. S7. Protein sequence alignment of CUS1 with two co-expressed tomato GDSL proteins.

The protein sequences encoded by *Solyc12g017460* and *Solyc02g077330* were blasted against CUS1 sequence (*Solyc11g006250*) through Clustal Omega (<https://www.ebi.ac.uk/Tools/msa/clustalo/>). The 'GDSL' (or similar) sequence is residues 50–53. Amino acid residues are highlighted as follows:

Blue: neutral amino acids (M, A, I, L, F, V, W); yellow: cyclic amino acid (P); green: amino acids with polar uncharged side groups (S, T, Q, N); orange: the simplest amino acid (G); pink: sulphur-containing amino acid (c); purple: negative-charged amino acids (E, D); red: positive-charged amino acids (R, K); turquoise: amino acids with polar aromatic side groups (Y, H).
